# Supplementary material for: MDTS: automatic complex materials design using Monte Carlo tree search
Source: PubMed Central journal article supplement (PMC5532970; doi:10.1080/14686996.2017.1344083), 2017-07-20
Supplement: tsta_a_1344083_sm1355.pdf [file tsta_a_1344083_sm1355.pdf]

## Supplemental Material

### MDTS: Automatic Complex Materials Design using Monte Carlo Tree Search

Thaer M. Dieb<sup>a,b</sup>, Shenghong Ju<sup>c</sup>, Kazuki Yoshizoe<sup>d</sup>, Zhufeng Hou<sup>a</sup>, Junichiro Shiomi<sup>a,c</sup> and Koji Tsuda<sup>a,b,d</sup>

<sup>a</sup>National Institute for Materials Science, 1-2-1 Sengen, Tsukuba, Ibaraki 305-0047 Japan;

<sup>b</sup>Graduate School of Frontier Sciences, The University of Tokyo, 5-1-5 Kashiwanoha, Kashiwa, Chiba 277-8561, Japan; <sup>c</sup>Department of Mechanical Engineering, The University of Tokyo, 7-3-1 Hongo, Bunkyo, Tokyo 113-8656, Japan; <sup>d</sup>RIKEN, Center for Advanced Intelligence Project, 1-4-1 Nihombashi, Chuo, Tokyo 103-0027, Japan

#### MDTS algorithm

MDTS: Materials Design using Monte Carlo tree search is an algorithm developed to solve structure determination of substitutional alloys problem. MDTS does not need any parameter tuning and can be adapted to several problems. The candidates space is represented as a tree where each node represents a possible atom assignment. Within a predetermined number of simulations, MDTS iterates over several rounds. Each round consists of four steps, Selection, Expansion, Simulation and Backpropagation. In the selection step, a promising leaf node is chosen by following the node with the best Upper Bound Confidence (UCB) score in each branch. The expansion step adds a number of children nodes to the selected one. In simulation, solutions are created by random playouts from the expanded nodes. The backpropagation step updates nodes' information along the path back to the root.

**Input:**  $N$ : number of positions in the structure,  $AT$ : List of atom types,  $AC$ : List of atom constraints,  $T$ : number of calculations

**Output:** List of positions optimally assigned with atoms

**function** MAKENODE( $parent, atom$ )

$node \leftarrow object$  ▷ create abstract object

$node.atom \leftarrow atom$  ▷ a node is an atom assignment to a position

$node.v \leftarrow 0$  ▷ visit count

$node.f \leftarrow 0.0$  ▷ immediate merit

$node.w \leftarrow 0.0$  ▷ accumulated merit

$node.z_{max} \leftarrow 0.0$  ▷ maximum immediate merit observed

$node.z_{min} \leftarrow \infty$  ▷ minimum immediate merit observed

$node.J \leftarrow 1$  ▷ adjust hyper-parameter C

$node.parent \leftarrow parent$  ▷ node parent

$node.children \leftarrow \emptyset$  ▷ node children

**return**  $node$

**end function**

```

function SELECT(node)
  if node has no children then
    return node
  else
     $C \leftarrow \frac{\sqrt{2}node.J}{4}(node.z_{max} - node.z_{min})$ 
     $bst\_child \leftarrow \operatorname{argmax}\left(\frac{node.w}{node.v} + C\sqrt{\frac{2\ln(node.parent.v)}{node.v}}\right)$ 
    return SELECT(bst_child)
  end if
end function

function EXPAND(node)
  for all atom  $\in AT$  do
    child  $\leftarrow$  MAKENODE(node, atom)
    node.children  $\leftarrow$  [node.children, child]
  end for
  return node.children
end function

function SIMULATE(node)
  structure  $\leftarrow$  list of all atoms on the path from the root to node
  if node is not maximum depth leaf then
    fill rest of the positions randomly  $\triangleright$  random playout with AC ensured to be met
  end if
  return structure
end function

function BACKPROPAGATE(node, e)
  node.w  $\leftarrow$  node.w + e
  node.v  $\leftarrow$  node.v + 1
  if e > node.zmax then
    node.zmax  $\leftarrow$  e
  end if
  if e < node.zmin then
    node.zmin  $\leftarrow$  e
  end if
  if node.parent is not None then
    return BACKPROPAGATE(node.parent, e)
  end if
end function

```

```

function ADJUCTC(node, j)
  node.J ← node.J + j
  if node.parent is not None then
    return ADJUCTC(node.parent, j)
  end if
end function

Start
Tree ← MAKENODE(None, None)
t ← 0
allsolutions ← ∅
while t ≤ T do
  currentnode ← SELECT(Tree)
  if currentnode is maximum depth leaf then
    solution ← SIMULATE(currentnode)
    e ← evaluate solution using experiment or computation
    BACKPROPAGATE(currentnode, e)
    allsolutions ← [allsolutions, solution]
  else
    children ← EXPAND(currentnode)
    for all child ∈ children do
      solution ← SIMULATE(child)
      e ← evaluate solution using experiment or computation
      BACKPROPAGATE(child, e)
      allsolutions ← [allsolutions, solution]
    end for
  end if
  if dead-end leaf then
    j ← max{ $\frac{T-t}{T}$ , 0.1}
    ADJUCTC(currentnode, j)
  end if
end while
return max(allsolutions)
End

```
